# Supplementary material for: Inhibition of Francisella tularensis phagocytosis using a novel anti-LPS scFv antibody fragment
Source: PubMed Central journal article supplement (PMC6684794; doi:10.1038/s41598-019-47931-w), 2019-08-06
Supplement: 41598_2019_47931_MOESM1_ESM.pdf [file 41598_2019_47931_MOESM1_ESM.pdf]

**Inhibition of *Francisella tularensis* phagocytosis using a novel anti-LPS  
scFv antibody fragment**

Adva Mechaly<sup>a</sup>, Uri Elia<sup>b</sup>, Ron Alcalay<sup>b</sup>, Hila Cohen<sup>b</sup>, Eyal Epstein<sup>c</sup>, Ofer

Cohen<sup>b\*</sup> and Ohad Mazor<sup>a\*</sup>

The Departments of Infectious Diseases<sup>a</sup>, Biochemistry and Molecular Genetics<sup>b</sup> and  
Biotechnology<sup>c</sup> ; Israel Institute for Biological Research, Ness-Ziona, Israel

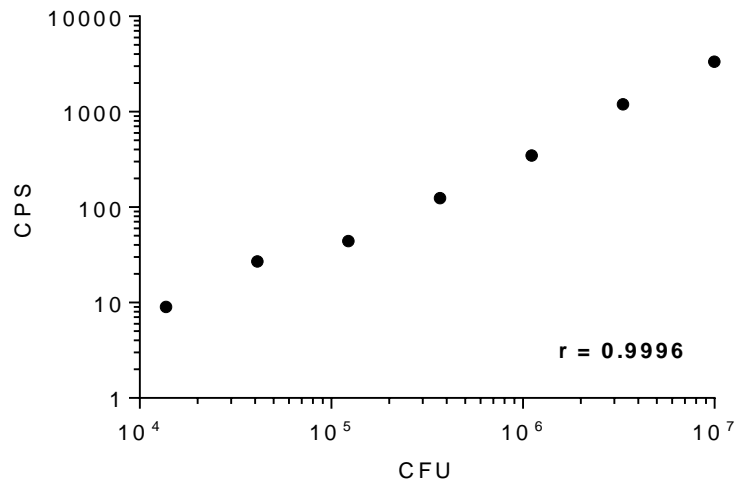

**Supplementary Figure S1.** Correlation between the bacterial LVS-pXB173-lux CFU (ranging from  $1.4 \times 10^4$  to  $1 \times 10^7$  CFU) and the luminescence levels.
